# Supplementary material for: The Coordinated Positive Regulation of Topoisomerase Genes Maintains Topological Homeostasis in Streptomyces coelicolor
Source: PubMed Central journal article supplement (PMC5055605; doi:10.1128/jb.00530-16), 2016-10-07
Supplement: JB.00530-16_zjb999094220so1.pdf [file JB.00530-16_zjb999094220so1.pdf]

# Table S1

**Table S1. Oligonucleotides**

| Oligonucleotide                    | Sequence                                                                   | Description                              |
|------------------------------------|----------------------------------------------------------------------------|------------------------------------------|
| H5xyI <sub>E</sub> _FW             | GGGGAGGCCACGCTCGACCGGAGAGAAG<br>AGCGAAGTTGATGAACAAAGGTGAATGCGA<br>C        | Construction of H1 strain                |
| PacIxyI <sub>E</sub> _RV           | GGTTAATTAATCAGGTCAGCACGTCATGA                                              | Construction of H1 strain                |
| PacIFRT_FW                         | GGTTAATTAATTCGGGGATCCGTCGACC                                               | Construction of H1 strain                |
| 3543RP1                            | GTGGAGACGTGCGGAGGAGCGGGCGGGTC<br>TGAGCCGGGCTGAGGCTGGAGCTGCTTC              | Construction of H1 strain                |
| prom1_PacI_FWD                     | CCGTTGCGGGCTTTCCGTTTGACACGGGG<br>GCGGGAGGTTAATTAATTCGGGGATCCGT<br>CGACC    | <i>topA</i> 1 disruption                 |
| prom1_PacI_RV                      | CCCGGGTTCGGGTCGTTCTGTGTTTCGATCG<br>TGACGCTGTTAATTAATGTAGGCTGGAGCTGC<br>TTC | <i>topA</i> 1 disruption                 |
| prom2_PacI_FWD                     | CGGAGCGGGTCAGCACTCCGGGCGGAGGA<br>ACGGGGTTTTAATTAATTCGGGGATCCGTC<br>GACC    | <i>topA</i> 2 disruption                 |
| prom2_PacI_RV                      | CCCCGTGTCAAACGGGAAAAGCCGCAAC<br>GGCCACTCGTTAATTAATGTAGGCTGGAGCT<br>GCTTC   | <i>topA</i> 2 disruption                 |
| 3543_400FW                         | GTGGACCACGACGCGGGTGC                                                       | translation start mapping                |
| 3543_77RV                          | GATCGTCTTCGCCTTGCGGGG                                                      | translation start mapping                |
| M13FW                              | GTAAAACGACGGCCAG                                                           | translation start mapping                |
| blap1apraFW                        | CCCTGATAAATGCTTCAATAATTTGAAAAAG<br>GAAGAGTATAACTTATGAGCTCAGCCAATC          | <i>amp<sup>R</sup></i> gene replacement  |
| balp2apraRV                        | AATCTAAAGTATATATGAGTAACTTGGTCTGA<br>CAGTTAAGTCCCGCCAGCCTCGCAGA             | <i>amp<sup>R</sup></i> gene replacement  |
| pForHyg6902                        | GTGCCGTTGATCGTGCTATG                                                       | <i>apra<sup>R</sup></i> gene replacement |
| pRevHyg6902                        | CCTTGCCCTCCAACGTCATCTCGTTCTCCGCT<br>CATGAGCTCAGGCCGCGGGGCGG                | <i>apra<sup>R</sup></i> gene replacement |
| <i>topA</i> promBamHIFW            | GCGGATCCGATCTTCGCGGGAGTGGTGTC                                              | pFLUXH cloning                           |
| <i>topA</i> promNdeI <sub>RV</sub> | CGCATATGCGCTCTTCTCCGGTCGACGC                                               | pFLUXH cloning                           |
| prom3543RTPCRFW                    | GATCGAAACACAGAACGACC                                                       | RT-qPCR/promoter mapping                 |
| prom_p2_3543_FW                    | CCGTTGCGGGCTTTCCCG                                                         | RT-qPCR/promoter mapping                 |
| prom3_ <i>topA</i> _FW             | GGGTTCTGCGGGTTACCG                                                         | promoter mapping                         |

**Table S2. Characterization of *S. coelicolor* strains under different supercoiling conditions**

| Strain <sup>1)</sup> | Inducer/antibiotic        | TopA level <sup>2)</sup> | <i>topAp1</i> specific transcript <sup>3)</sup> | <i>topA</i> overall transcript | <i>gyrB</i> overall transcript | Reporter plasmid <sup>4)</sup>      |
|----------------------|---------------------------|--------------------------|-------------------------------------------------|--------------------------------|--------------------------------|-------------------------------------|
| M145 (MS10)          | none                      | 1.00                     | 1.00 ± 0.15                                     | 1.00 <sup>2)</sup> ± 0.11      | 1.00 <sup>2)</sup> ± 0.04      | -0.030<br>See Fig. 5 and Fig. 3     |
| PS04 (MS11)          | none                      | below detection          | 2.47 <sup>3)</sup> ± 0.20                       | 0.05 ± 0.01                    | 0.84 ± 0.11                    | -0.037<br>See Fig. 3                |
| PS04 (MS11)          | Thiostrepton<br>2.0 µg/ml | 0.64                     | nd                                              | 1.31 ± 0.10                    | 1.00 ± 0.05                    | nd                                  |
| PS04 (MS11)          | Thiostrepton<br>5.0 µg/ml | 1.25                     | nd                                              | 7.44 ± 0.35                    | 1.86 ± 0.27                    | -0.033 <sup>5)</sup><br>See Fig. S4 |
| PS07 (MS12)          | none                      | 0.86                     | 1.14 ± 0.08                                     | 1.28 ± 0.08                    | nd                             | -0.031<br>See Fig. S4               |
| PS07 (MS12)          | Thiostrepton<br>5.0 µg/ml | 3,44                     | 0.91 ± 0.02                                     | 19.52 ± 0.21                   | nd                             | -0.024 <sup>4)</sup><br>See Fig. S4 |
| M145 (MS10)          | Novobiocin<br>1.0 µg/ml   | 1.01                     | 0.87 ± 0.17                                     | 0.87 ± 0.11                    | 2.33 ± 0.27                    | nd                                  |
| M145 (MS10)          | Novobiocin<br>5.0 µg/ml   | 0.91                     | 0.83 ± 0.10                                     | 0.80 ± 0.13                    | 8.34 ± 1.10                    | -0.018 <sup>6)</sup><br>See Fig. 5  |

<sup>1)</sup> in brackets the corresponding strain carrying the reporter plasmid

<sup>2)</sup> the data were related to the wild type strain (M145) equated to 1.00

<sup>3)</sup> the transcript specific to *topAp1* promoter was determined in the MG04 strain (PS04, with the reporter genes replacing *topA* in the native locus, under control of the *topA* promoter)

<sup>4)</sup> the median value of superhelical density was calculated using Fiji Software

<sup>5)</sup> the value calculated 60 minutes after exposition to thiostrepton

<sup>6)</sup> the value calculated 10 minutes after exposition to novobiocin

# Figure S1

**A**

TCGGAGCGGGTCAGCACTCCGGGCGGCAGGAACGGGGTTCGTCGGGGTTACCGTTCGAGTG<sup>p2<sub>-10</sub></sup> Ts2  
 GCCGTTGCGGGCTTTTCCCGTTTGACACGGGGGCGGGAGGTTACCGTCACACTCCGCAGCG<sup>p1<sub>-10</sub></sup> Ts1'

Ts1  
 TCAGATCGAAACACAGAACGACCCGACCCCGGGACCACGGCCTGGGGAGGCCAGCGTC

GACCGGAGAGAAGAGCGAAGTTGTCCCCGACCAGCGAGACCGCGAAGGGCGGCCGACGAC

translation start codon

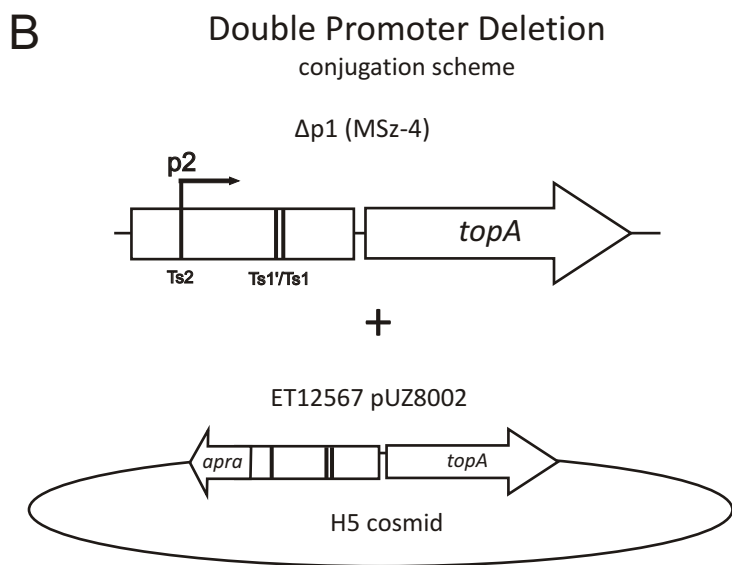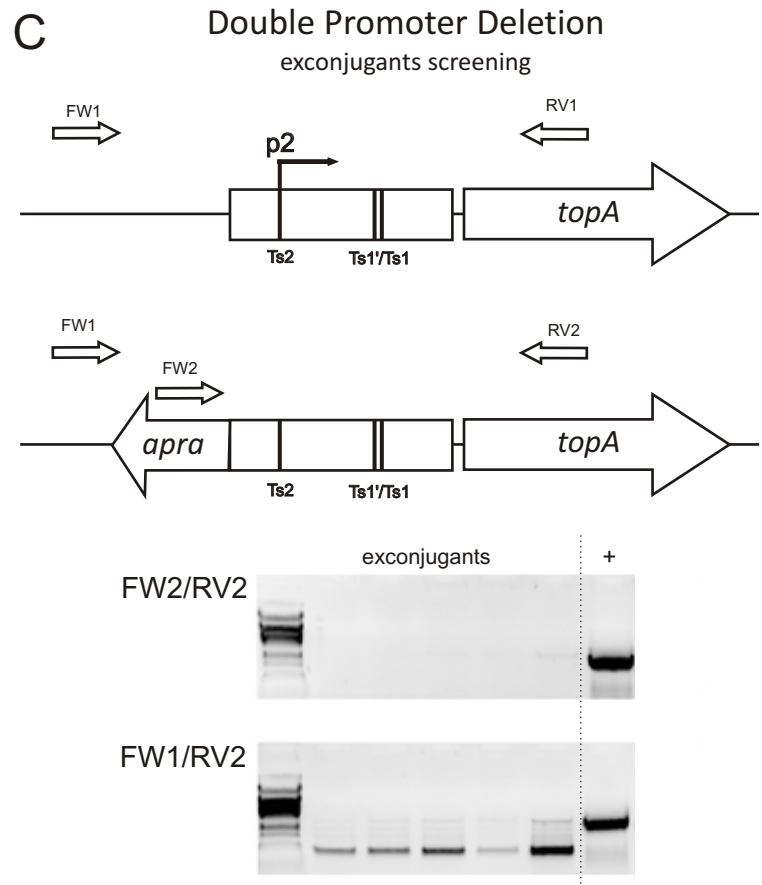

**Figure S1. Construction of p1 and/or p2 mutants of the *S. coelicolor* topA promoter.** (A) To disrupt p1 (MSz-4) or p2 (MSz-1a) promoter of the *topA* gene the sequence (underlined) upstream transcription start point (red) was replaced with TTAATTAA sequence recognized by *PacI* restriction enzyme. For more details see *Materials and Methods*. (B) To disrupt the p1 and p2 promoters, we used the MSz-4 strain conjugated to the H5 cosmid carrying a double p1/p2 mutation. Screening the double exconjugants with specific oligonucleotides. (C) Double promoter deletion resulted in the introduction of an apramycin resistance cassette in place of the p2 promoter and was detected using FW2/RV2 oligonucleotides (control H5 cosmid - marked with +). The proper recombination pattern was not detected in any of the tested exconjugants. PCR analysis with FW1/RV1 oligonucleotides shows that the promoter region remained intact.

# Figure S2

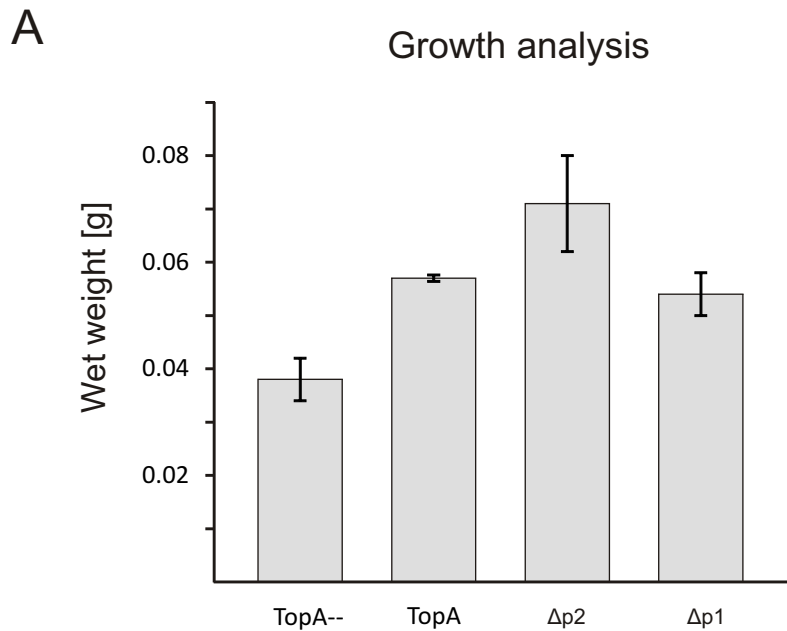

**B**

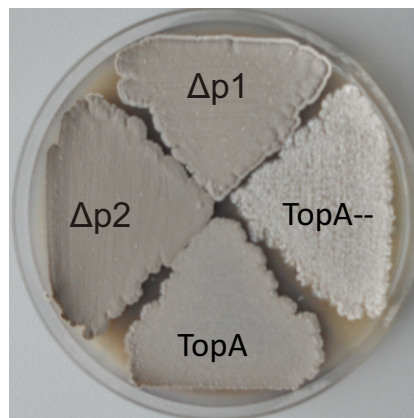

**Figure S2. Analysis of the growth and differentiation of *S. coelicolor topA* promoter mutants. (A)** The growth rate of *S. coelicolor topA* promoter mutants ( $\Delta p1$  and  $\Delta p2$ ), quantified by weighing the cell pellet collected after 24 hours of growth in liquid 79 medium. The wild type strain (TopA) and TopA-depletion strain (TopA-) served as control samples. **(B)** The sporulation of the *topA* promoter mutants ( $\Delta p1$  and  $\Delta p2$ ) was examined on solid MS medium. The wild type strain (TopA, sporulating) and TopA-depletion (TopA-, nonsporulating, white) strains served as controls.

# Figure S3

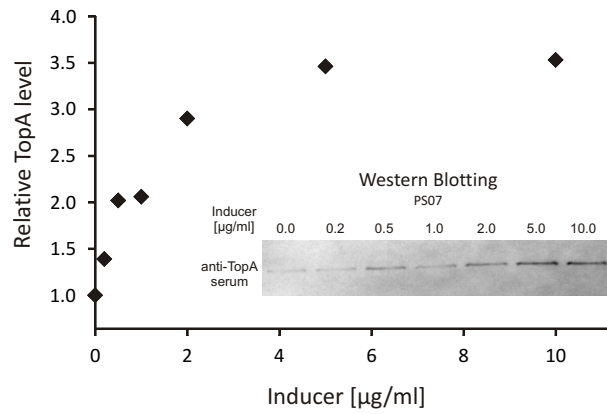

**Figure S3.** Analysis of TopA level in the PS07 strain growing constantly in the presence of increasing amounts of the inducer, as assessed by western blot with anti-TopA polyclonal antibodies.

# Figure S4

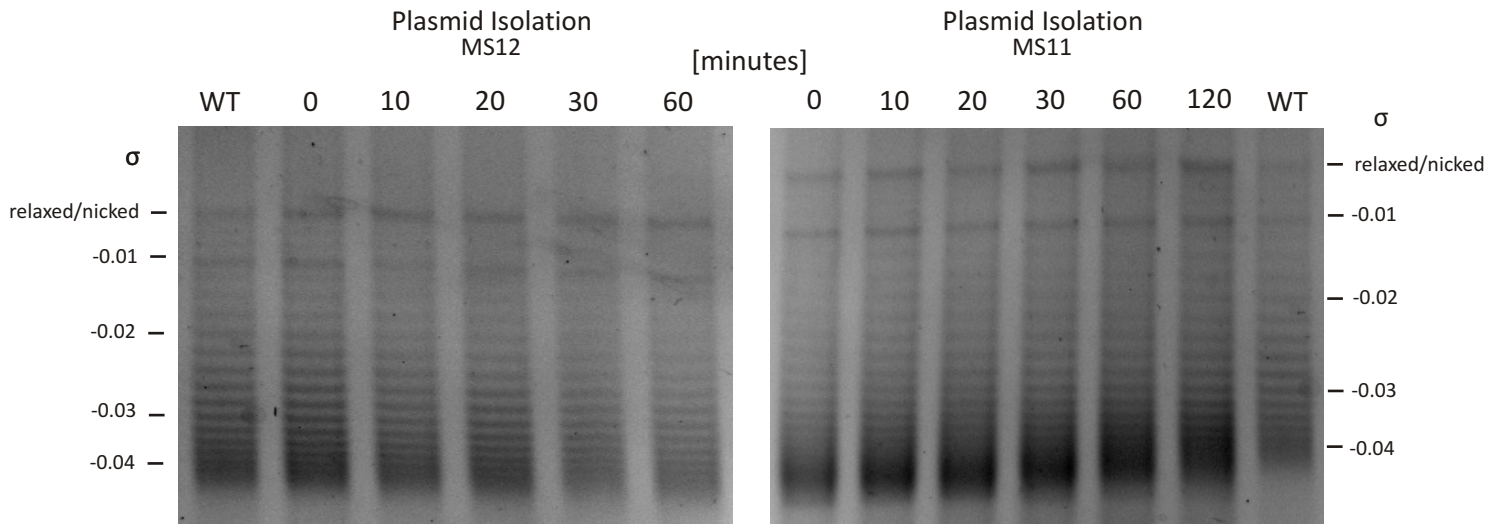

**Figure S4. The isolation of the reporter plasmid pWHM3Hyg (A)** The plasmid isolated from MS12 (a derivative of TopA overproducing PS07 strain) cultured in the presence of the inducer (5 $\mu$ g/ml) in time up to 60 minutes **(B)** The plasmid isolated from MS11 (a derivative of TopA-depleted PS04 strain) cultured in the presence of 5  $\mu$ g/ml of thiostrepton in time up to 120 minutes. Both strains were compared to the plasmid isolated from the wild type strain not exposed to thiostrepton.

# Figure S5

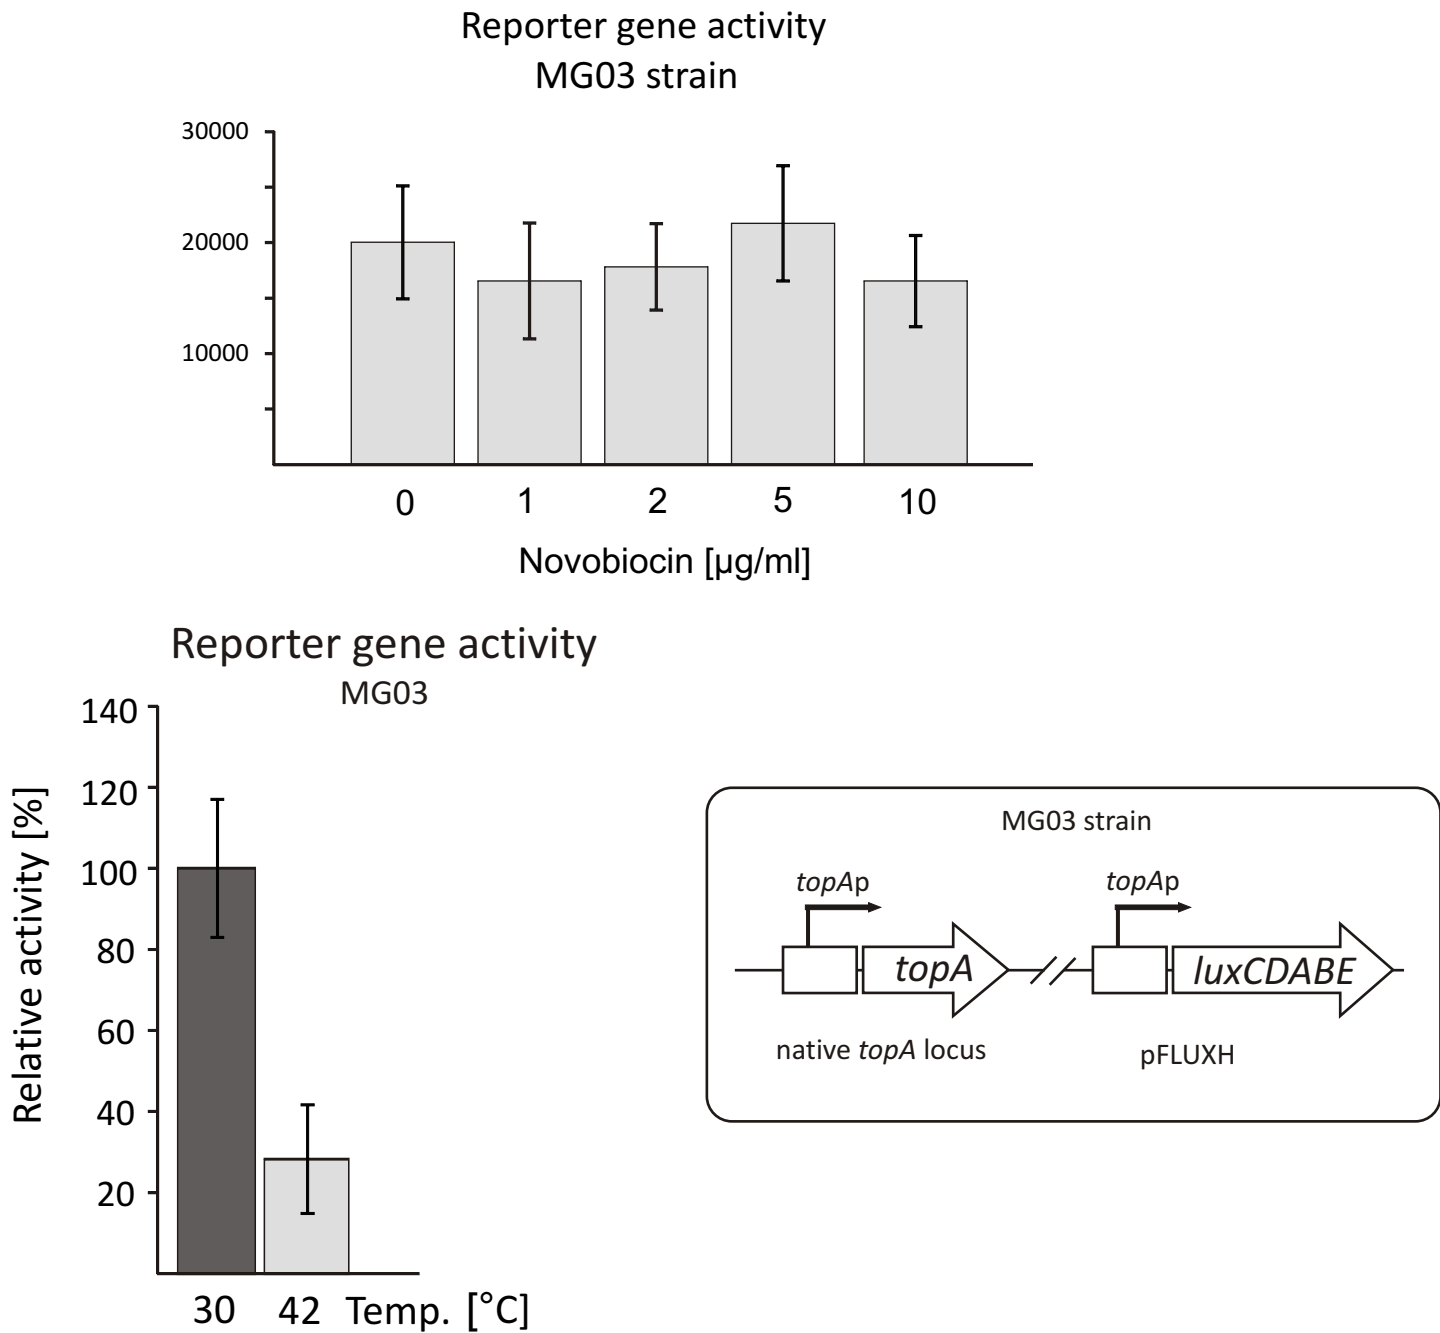

**Figure S5. The influence of novobiocin and heat shock on the expression of the reporter gene under control of *topA* promoter in a wild type background.** (A) The luciferase activity in the MG03 strain (see the scheme below) after treatment with increasing concentrations of novobiocin. (B) The luciferase activity in the MG03 strain after exposure to 42°C (120 minutes) normalized to standard conditions (30°C).

# Figure S6

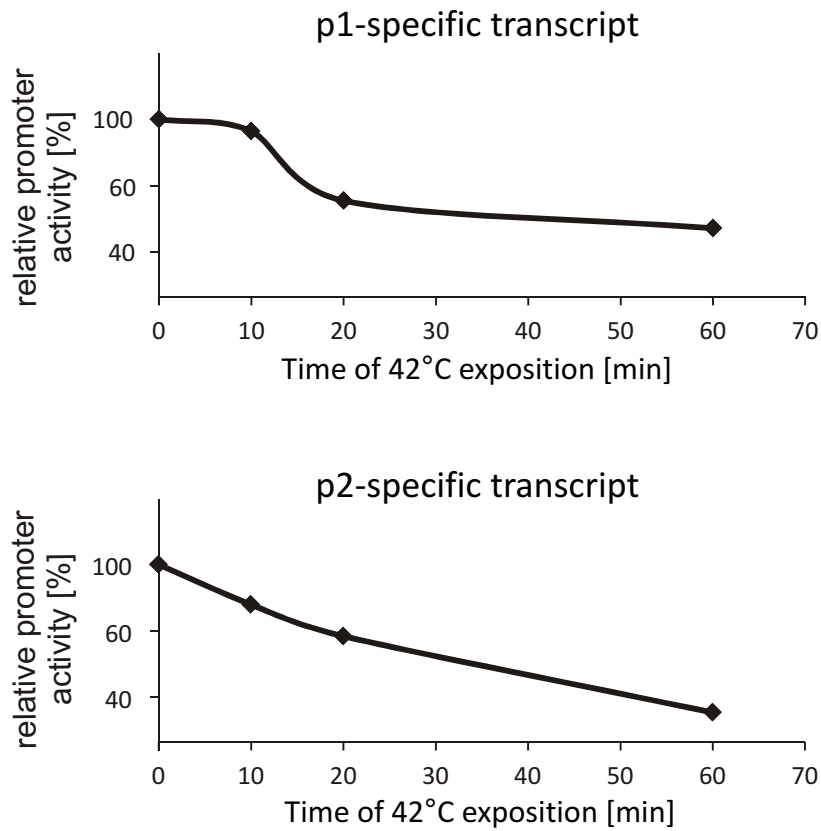

**Figure S6. The specific activity of the *topA* p1 and p2 promoters under heat shock conditions.** The level of each transcript was quantified using RT-qPCR. The transcript level isolated from cells not exposed to 42°C was estimated as 100%.



# Figure S7

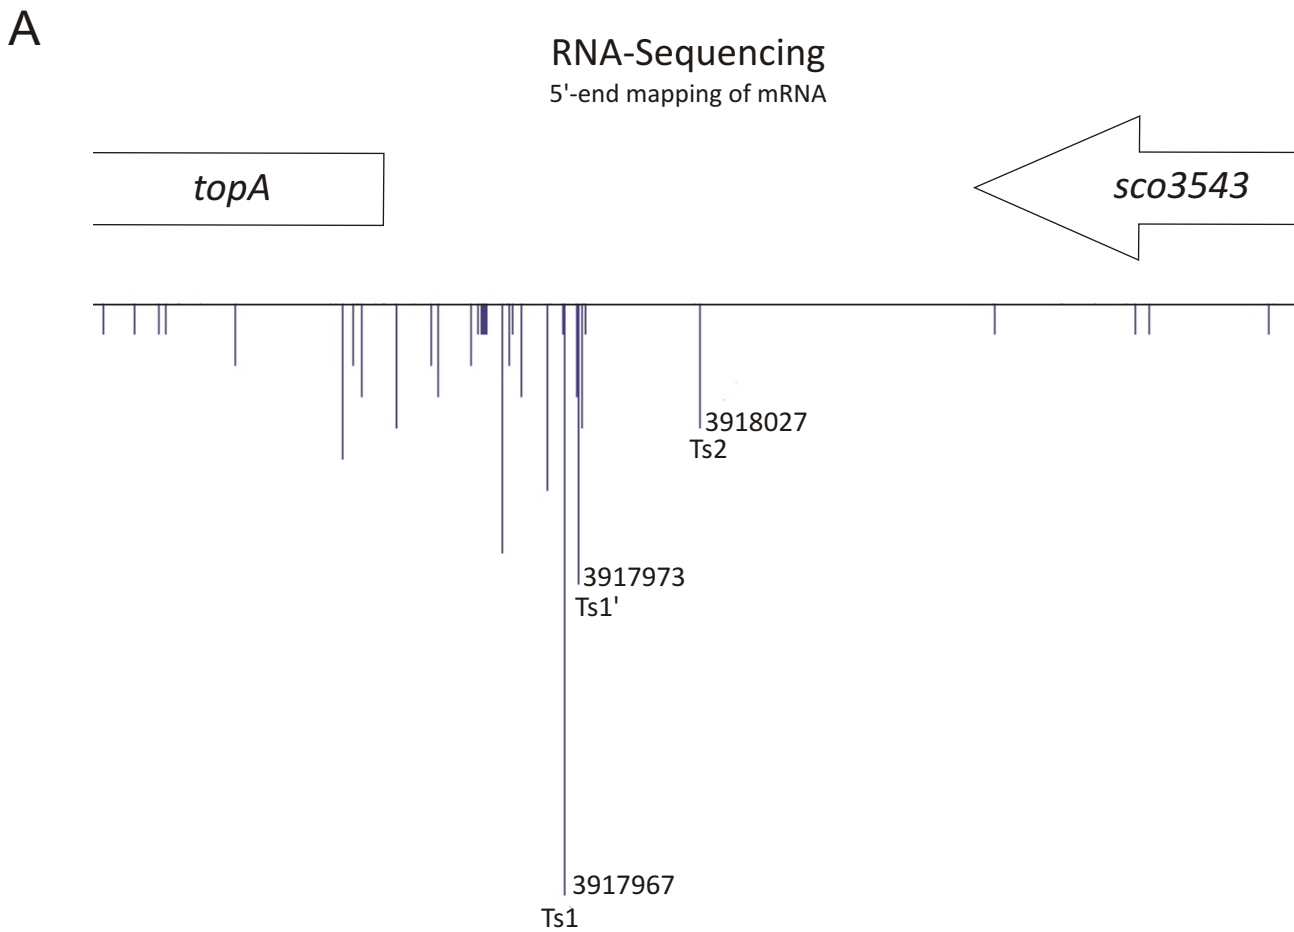

**B**

| Site | Chromosome position |                |
|------|---------------------|----------------|
|      | S1 mapping          | RNA-Sequencing |
| Ts1  | 3917968             | 3917967        |
| Ts1' | 3917973             | 3917973        |
| Ts2  | 3918029             | 3918027        |

**Figure S7. Identification of the *topA* transcription start point using 5'-end differential mapping.** (A) A magnified view of the *topA* upstream region showing the location of transcriptional start points (Ts1/Ts1' and Ts2). The number above corresponds to the chromosomal locus of each site. (B) A comparison of the chromosomal loci of the Ts1/Ts1' and Ts2 sites using S1 nuclease mapping and 5'-end mapping.

# Figure S8

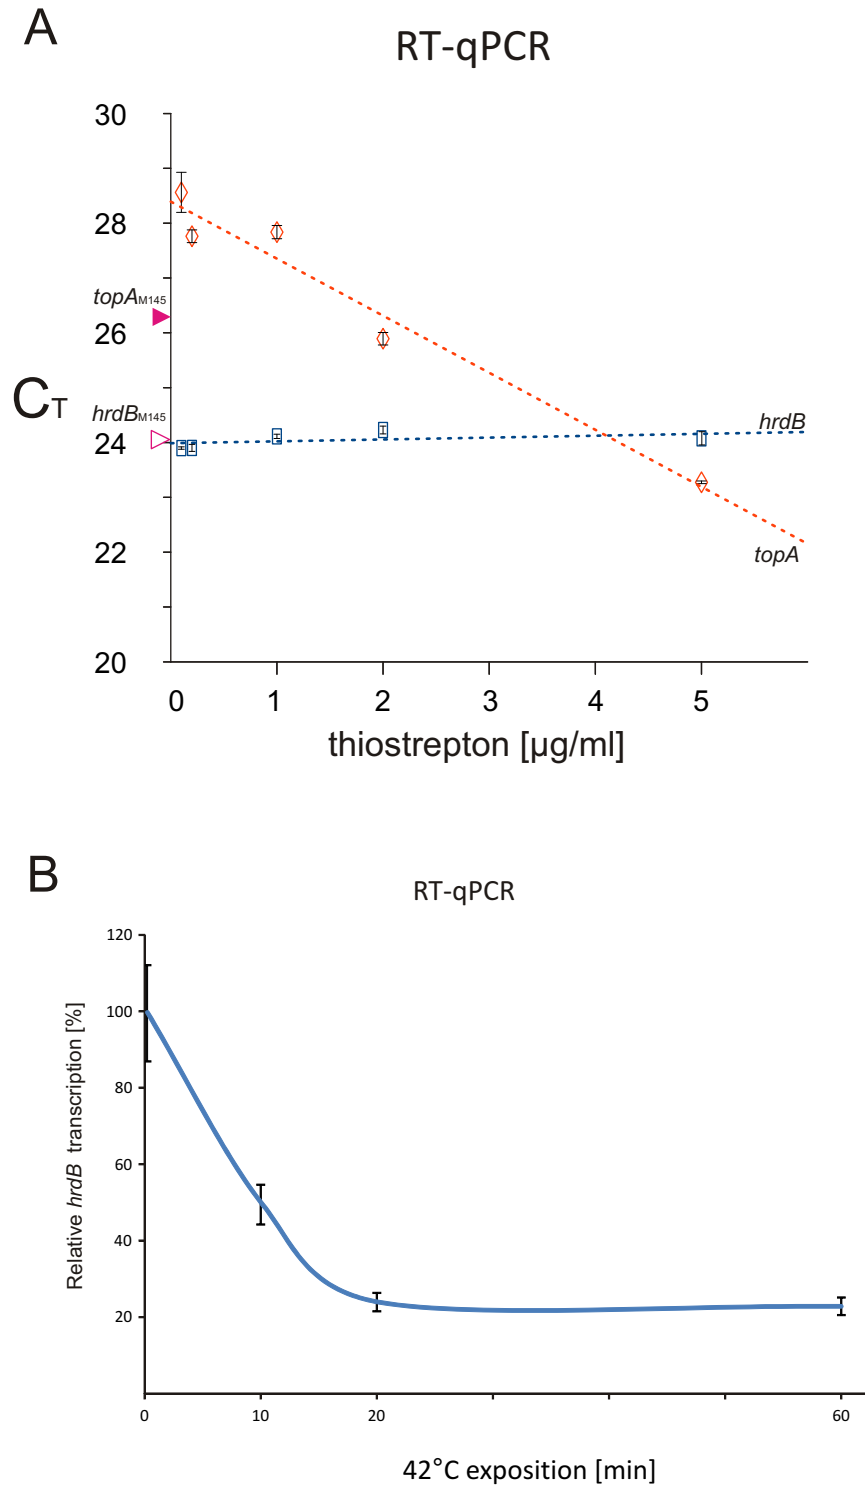

**Figure S8. RT-qPCR analysis of *hrdB* gene transcription in *S. coelicolor*.** (A) A comparison of Ct values for *hrdB* (blue) and *topA* (orange) transcripts. RNA was isolated from PS04 strains with different DNA supercoiling levels. The Ct values corresponding to the wild type level of transcript for *hrdB* (empty arrow) and *topA* (filled arrow) are marked. (B) Relative *hrdB* transcription after exposure of the wild type strain to temperature stress (42°C).

# Figure S9

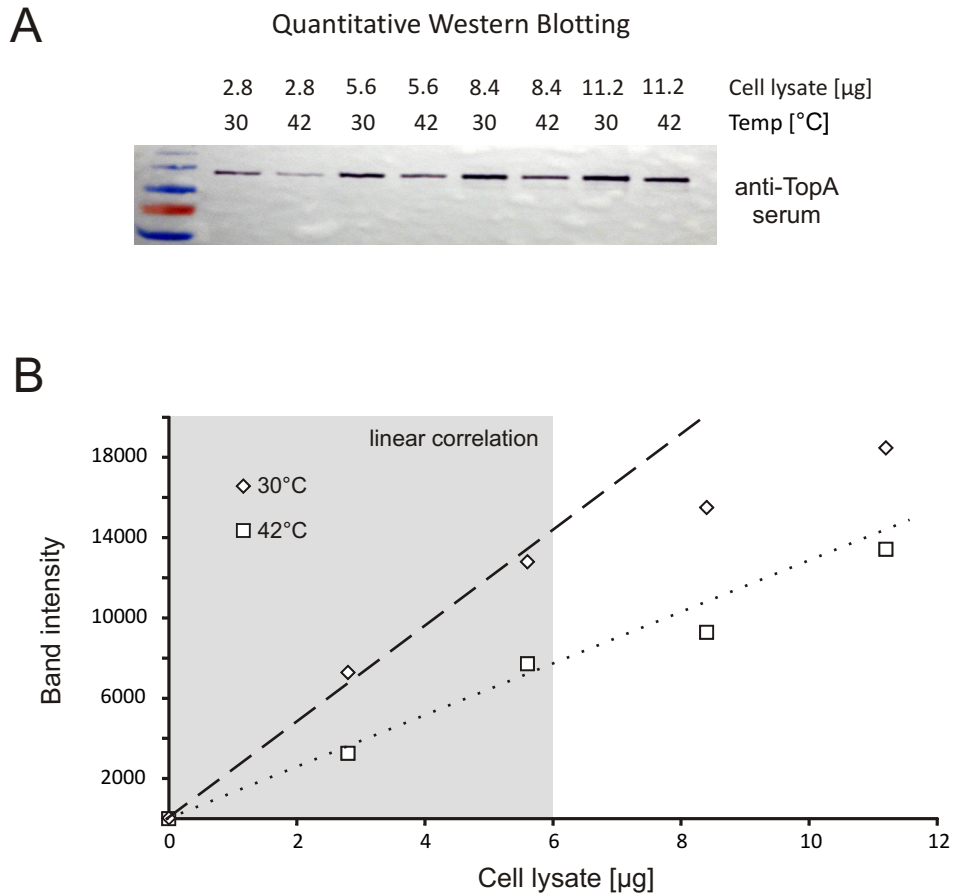

**Figure S9. Quantitative western blotting.** (A) The detection of TopA protein in *S. coelicolor* cell lysate using anti-TopA polyclonal antibody. Prior to disruption, the cells were exposed to an elevated temperature (42°C) for 60 min. Cells that had not been heat-shocked served as a control. Different amounts of cell lysate ( $\mu\text{g}$  of total protein) were loaded on the gel, as indicated. (B) The correlation of band intensity and the amount of total protein loaded for quantitative Western blotting (the range of linear correlation is marked in grey). The band intensity was measured using ImageJ2x software.

## MIQE form. RT-qPCR and sample information

### Experimental Design

---

|                                                            |   |                                                                                                          |
|------------------------------------------------------------|---|----------------------------------------------------------------------------------------------------------|
| Definition of experimental and control groups              | E | <i>Streptomyces coelicolor</i> at different stages of culture and/or culture exposed to high temperature |
| Number within each group                                   | E | Each sample was repeated in 1-3 biological replicates                                                    |
| Assay carried out by the core or investigator's laboratory | D | Assay carried out by investigator lab                                                                    |
| Acknowledgment of authors' contribution                    | D | -                                                                                                        |

### Sample

---

|                                                                                   |   |                                                                                                                                                                                 |
|-----------------------------------------------------------------------------------|---|---------------------------------------------------------------------------------------------------------------------------------------------------------------------------------|
| Description                                                                       | E | <i>Streptomyces coelicolor</i> growing for 24 hours (180 rpm shaking, 37°C) in liquid 79 medium. To induce heat-shock cell were exposed to 42°C for 10-120 minutes              |
| Volume/mass of sample processed                                                   | D | 50-100 mg of vegetative hyphae after 24 hours of growth                                                                                                                         |
| Microdissection or macrodissection                                                | E | -                                                                                                                                                                               |
| Processing procedure                                                              | E | Collected hyphae was washed with 5ml of cold PBS buffer and immediately processed using manufacturers protocol (see also section: Name of kit and details of any modifications) |
| If frozen, how and how quickly?                                                   | E | -                                                                                                                                                                               |
| If fixed, with what and how quickly?                                              | E | -                                                                                                                                                                               |
| Sample storage conditions and duration (especially for FFPE <sup>2</sup> samples) | E | -20°C until use                                                                                                                                                                 |

### Nucleic acid extraction

---

|                                  |   |                                                                                                                              |
|----------------------------------|---|------------------------------------------------------------------------------------------------------------------------------|
| Procedure and/or instrumentation | E | Total RNA from <i>S. coelicolor</i> vegetative hyphae was isolated using modified manufacturers protocol (see details below) |
|----------------------------------|---|------------------------------------------------------------------------------------------------------------------------------|

|                                                    |   |                                                                                                                                                                                                                                                                                                                                                                                                                                                                         |
|----------------------------------------------------|---|-------------------------------------------------------------------------------------------------------------------------------------------------------------------------------------------------------------------------------------------------------------------------------------------------------------------------------------------------------------------------------------------------------------------------------------------------------------------------|
| Name of kit and details of any modifications       | E | Total RNA was isolated using GeneJet RNA Isolation Kit (Thermo Scientific) using the modified manufacturers protocol (Bacteria Total RNA purification procedure D) #1 step 2: before lysis, cell were treated with 200 µl of lysozyme solution (1mg/ml); #2 step 3: 4-5 drops of zirconia beads in PBS buffer were added and vortexed for 1 min to increase cell disruption efficiency; #3 step 4 and step 5: the volumes of lysis buffer and 100% ethanol were doubled |
| Source of additional reagents used                 | D | -                                                                                                                                                                                                                                                                                                                                                                                                                                                                       |
| Details of DNase or RNase treatment                | E | DNA traces were removed by treatment of 2 µg of isolated RNA with RNase-free DNase I (Thermo Scientific) following manufacturers instruction                                                                                                                                                                                                                                                                                                                            |
| Contamination assessment (DNA or RNA)              | E | RNA after DNase I treatment served as template for standard PCR reaction with RT3543RV and prom3543RTPCR_FW oligonucleotides. No detectable product after 30 reaction cycles proved elimination of DNA traces (chromosomal DNA)                                                                                                                                                                                                                                         |
| Nucleic acid quantification                        | E | The RNA quality was tested using standard gel electrophoresis in the presence of ethidium bromide. Only RNA samples with no detectable degradation was used for cDNA synthesis. The RNA quantity was measured spectrophotometrically                                                                                                                                                                                                                                    |
| Instrument and method                              | E | NanoDrop 1000 Spectrophotometer                                                                                                                                                                                                                                                                                                                                                                                                                                         |
| Purity ( $A_{260}/A_{280}$ )                       | D | samples with OD ratio of at least 1,8 were used for further analysis                                                                                                                                                                                                                                                                                                                                                                                                    |
| Yield                                              | D | -                                                                                                                                                                                                                                                                                                                                                                                                                                                                       |
| RNA integrity                                      | E | agarose-gel electrophoresis                                                                                                                                                                                                                                                                                                                                                                                                                                             |
| RIN/RQI or Cq of 3' and 5' transcripts             | E | not performed                                                                                                                                                                                                                                                                                                                                                                                                                                                           |
| Electrophoresis traces                             | E | not performed                                                                                                                                                                                                                                                                                                                                                                                                                                                           |
| Inhibition testing (Cq dilutions, spike, or other) | E | not performed                                                                                                                                                                                                                                                                                                                                                                                                                                                           |

### Reverse transcription

---

|                                                            |   |                                                                                                                                   |
|------------------------------------------------------------|---|-----------------------------------------------------------------------------------------------------------------------------------|
| Complete reaction conditions                               | E | cDNA was synthesized from 1 µg of total RNA using iScript Reverse Transcription Kit (Bio-Rad) following manufacturer instructions |
| Amount of RNA and reaction volume                          | E | 1 µg in 20 µl                                                                                                                     |
| Priming oligonucleotides (if using GSP) and concentrations | E | random primers, according to the manufacturer instructions                                                                        |
| Reverse transcriptase and concentration                    | E | according to the manufacturer instructions                                                                                        |
| Temperature and time                                       | E | according to the manufacturer instructions                                                                                        |
| Manufacturer of reagents and catalogue numbers             | D | Bio-Rad                                                                                                                           |
| C <sub>q</sub> s with and without reverse transcription    | D | not performed                                                                                                                     |
| Storage conditions of cDNA                                 | D | -20°C                                                                                                                             |

### qPCR target information

---

|                                                 |   |                                                  |
|-------------------------------------------------|---|--------------------------------------------------|
| Gene symbol                                     | E | see primer and amplicon information on this file |
| Sequence accession number                       | E | see primer and amplicon information on this file |
| Location of amplicon                            | D | -                                                |
| Amplicon length                                 | E | see primer and amplicon information on this file |
| In silico specificity screen (BLAST, and so on) | E | analysis not performed                           |
| Pseudogenes, retropseudogenes, or other         |   |                                                  |

|                                           |   |                        |
|-------------------------------------------|---|------------------------|
| homologs?                                 | D | -                      |
| Secondary structure analysis of amplicon  | D | analysis not performed |
| Location of each primer by exon or intron | E | not applicable         |
| What splice variants are targeted?        | E | not applicable         |

### qPCR oligonucleotides

---

|                                            |   |                                                  |
|--------------------------------------------|---|--------------------------------------------------|
| Primer sequences                           | E | see primer and amplicon information on this file |
| RTPrimerDB identification number           | D | -                                                |
| Probe sequences                            | D | not applicable                                   |
| Location and identity of any modifications | E | none                                             |
| Manufacturer of oligonucleotide            | D | Sigma Aldrich                                    |
| Purification method                        | D | none                                             |

### qPCR protocol

---

|                                                             |   |                                                                                                                                                           |
|-------------------------------------------------------------|---|-----------------------------------------------------------------------------------------------------------------------------------------------------------|
| Complete reaction conditions                                | E | 20 $\mu$ l reaction contained forward and reverse oligonucleotides in concentration 20 pmol/ $\mu$ l, 10 $\mu$ l of SYBR Green Master Mix, 120 ng of cDNA |
| Reaction volume and amount of cDNA/DNA                      | E | See details above                                                                                                                                         |
| Primer, (probe), Mg <sup>2+</sup> , and dNTP concentrations | E | See detail above, Mg <sup>2+</sup> and dNTP were supplied in SYBR Green Master Mix                                                                        |

|                                                 |   |                                                                                                                                                        |
|-------------------------------------------------|---|--------------------------------------------------------------------------------------------------------------------------------------------------------|
| Polymerase identity and concentration           | E | according to the manufacturer instructions                                                                                                             |
| Buffer/kit identity and manufacturer            | E | iTaq Universal SYBR Green Supermix (Bio-Rad)                                                                                                           |
| Exact chemical composition of the buffer        | D | -                                                                                                                                                      |
| Additives (SYBR Green I, DMSO, and so forth)    | E | -                                                                                                                                                      |
| Manufacturer of plates/tubes and catalog number | D | Applied Biosystems                                                                                                                                     |
| Complete thermocycling parameters               | E | 10 min at 95°C, followed by 40 cycles of 15 s at 95°C, 15 s at 58°C, and 15 s 72°C. The amplification process was followed by a melting curve analysis |
| Reaction setup (manual/robotic)                 | D | -                                                                                                                                                      |
| Manufacturer of qPCR instrument                 | E | StepOnePlus Real-Time PCR System (Applied Biosystems)                                                                                                  |

#### **qPCR validation**

---

|                                               |   |                                                                                   |
|-----------------------------------------------|---|-----------------------------------------------------------------------------------|
| Evidence of optimization (from gradients)     | D | -                                                                                 |
| Specificity (gel, sequence, melt, or digest)  | E | Specificity was validated with melt curve analysis (see information on this file) |
| For SYBR Green I, Cq of the NTC               | E | Ct undetected (see information on this file)                                      |
| Calibration curves with slope and y intercept | E | see information on this file                                                      |
| PCR efficiency calculated from slope          | E | see information on this file                                                      |
| CI for PCR efficiency or SE                   | D | -                                                                                 |
| r <sup>2</sup> of calibration curve           | E | see information on this file                                                      |
| Linear dynamic range                          | E | Ct20 to Ct35                                                                      |
| Cq variation at LOD                           | E | -                                                                                 |



|                                                |   |   |
|------------------------------------------------|---|---|
| CIs throughout range                           | D | - |
| Evidence for LOD                               | E | - |
| If multiplex, efficiency and LOD of each assay | E | - |

### Data analysis

---

|                                                                          |   |                                                                                                                                                                                                                                                                                                                                                           |
|--------------------------------------------------------------------------|---|-----------------------------------------------------------------------------------------------------------------------------------------------------------------------------------------------------------------------------------------------------------------------------------------------------------------------------------------------------------|
| qPCR analysis program (source, version)                                  | E | StepOne Software Version 2.3 (Life Technologies)                                                                                                                                                                                                                                                                                                          |
| Method of Cq determination                                               | E | The fluorescence threshold for determining Cq values is automatically set at 1 cycle below the upper limit of the window of linearity                                                                                                                                                                                                                     |
| Outlier identification and disposition                                   | E | -                                                                                                                                                                                                                                                                                                                                                         |
| Results for NTCs                                                         | E | Ct undetected, see information on this file and section: Contamination assessment (DNA or RNA)                                                                                                                                                                                                                                                            |
| Justification of number and choice of reference genes                    | E | <i>hrdB</i> , see information on this file                                                                                                                                                                                                                                                                                                                |
| Description of normalization method                                      | E | The copy number of each transcript was quantified using calibration curve prepared for H5 cosmid (carrying the <i>S. coelicolor</i> chromosome fragment with targeted gene). For some experiments (see detail in the manuscript) normalized gene expression ratios were calculated by the $\Delta\Delta C_t$ method with <i>hrdB</i> as a reference gene. |
| Number and concordance of biological replicated                          | D | -                                                                                                                                                                                                                                                                                                                                                         |
| Number and stage (reverse transcription or qPCR) of technical replicates | E | three                                                                                                                                                                                                                                                                                                                                                     |
| Repeatability (intraassay variation)                                     | E | see figures attached to the manuscript                                                                                                                                                                                                                                                                                                                    |
| Reproducibility (interassay variation, CV)                               | D | -                                                                                                                                                                                                                                                                                                                                                         |

|                                              |   |                                                             |
|----------------------------------------------|---|-------------------------------------------------------------|
| Power analysis                               | D | -                                                           |
| Statistical methods for results significance | E | -                                                           |
| Software (source, version)                   | E | algorithms incorporated to the StepOne Software Version 2.3 |
| Cq or raw data submission with RDML          | D | -                                                           |

### MIQE form. The oligonucleotides used in qPCR experiments

| Oligonucleotide | Sequence               |
|-----------------|------------------------|
| <i>hrdBRT_f</i> | TGCTCTTCCTGGACCTCATC   |
| <i>hrdBRT_r</i> | GTAGCCCTTGGTGTAGTCGAA  |
| RT3543FWD       | ACGACTTCCAGCCGATCTATGT |
| RT3543RV        | GGAACACCATGCGCTTGAC    |
| prom_p2_3543_FW | CCGTTGCGGGCTTTTCCCG    |
| prom2_166RV     | CTTCGCGGTCTCGCTGGTC    |
| RTPCR3874RV     | TCGAGGGACAGGTCTTGTC    |
| RTPCR3874FW     | TCGACTTCGTGACGTACCTCAA |
| <i>luxC_FW</i>  | CGGCGACAACAGCGTCTA     |
| <i>luxC_RV</i>  | CAACCGCAGCTTGTTGTTCTC  |
| prom_p1_3543_FW | GATCGAAACACAGAACGACC   |
| prom1_170_RV    | GGCCGAGATAGCCCTTGATC   |

**MIQE form. The amplicon details**

| Oligonucleotides                  | Amplicon name     | Amplicon length | Tm [°C] | Slope  | Efficiency | r <sup>2</sup> |
|-----------------------------------|-------------------|-----------------|---------|--------|------------|----------------|
| RT3543FWD/ RT3543RV               | P1+P2             | 186 bp          | 84.87   | -3.581 | 90.221%    | 0.998          |
| prom_p2_3543_FW/ prom2_166RV      | P2                | 166 bp          | 87.69   | -3.673 | 87.176%    | 0.993          |
| prom_p1_3543_FW/ prom1_170_RV     | P1                | 170 bp          | 85.87   | -3.788 | 83.656%    | 0.986          |
| <i>luxC</i> _FW/ <i>luxC</i> _RV  | P1+P2_ <i>lux</i> | 88 bp           | 80.65   | -3.493 | 93.343%    | 0.994          |
| prom_p2_3543_FW/ <i>luxC</i> _RV  | P2_ <i>lux</i>    | 310 bp          | 86.75   | -3.512 | 92.636%    | 0.999          |
| <i>hrdBRT_f</i> / <i>hrdBRT_r</i> | <i>hrdB</i>       | 82 bp           | 82.35   | nd     | nd         | nd             |
| RTPCR3874FW/RTPCR3874RV           | <i>gyrase</i>     | 100 bp          | 83.99   | nd     | nd         | nd             |
